# Supplementary material for: Biological Convergence of Cancer Signatures
Source: PLoS One. 2009 Feb 20;4(2):e4544. doi: 10.1371/journal.pone.0004544 (PMC2642727; doi:10.1371/journal.pone.0004544)
Supplement: Table S1 — (0.03 MB XLS) [file pone.0004544.s002.xls]

## Sheet: Cancer signatures
Supplementary Table S1. Cancer signatures
Type / Condition			PubMed
Prognosis
Breast cancer
21-gene			A multigene assay to predict recurrence of tamoxif...[N Engl J Med. 2004] - PubMed Result
70-gene			Gene expression profiling predicts clinical outcom...[Nature. 2002] - PubMed Result
Hypoxia response*			Gene expression programs in response to hypoxia: c...[PLoS Med. 2006] - PubMed Result
Intrinsic subtype			Molecular portraits of human breast tumours. [Nature. 2000] - PubMed Result
			The molecular portraits of breast tumors are conse...[BMC Genomics. 2006] - PubMed Result
Wound response (with and without			Robustness, scalability, and integration of a woun...[Proc Natl Acad Sci U S A. 2005] - PubMed Result
cell cycle-associated genes)
ER-negative breast cancer
Immune response			An immune response gene expression module identifi...[Genome Biol. 2007] - PubMed Result
Total prognostic set (same study)			An immune response gene expression module identifi...[Genome Biol. 2007] - PubMed Result
Other cancer types
Acute myelogenous leukemia			Use of gene-expression profiling to identify progn...[N Engl J Med. 2004] - PubMed Result
B-cell lymphoma			Distinct types of diffuse large B-cell lymphoma id...[Nature. 2000] - PubMed Result
Bladder			Identifying distinct classes of bladder carcinoma ...[Nat Genet. 2003] - PubMed Result
Central nervous system			Prediction of central nervous system embryonal tum...[Nature. 2002] - PubMed Result
Colorectal (A)			Gene expression profiles and molecular markers to ...[J Clin Oncol. 2004] - PubMed Result
Colorectal (B)			Molecular staging for survival prediction of color...[J Clin Oncol. 2005] - PubMed Result
Colorectal (C; Germany)			Multiple gene expression classifiers from differen...[Clin Cancer Res. 2007] - PubMed Result
Colorectal (D; New Zeland)			Multiple gene expression classifiers from differen...[Clin Cancer Res. 2007] - PubMed Result
Lung			Gene-expression profiles predict survival of patie...[Nat Med. 2002] - PubMed Result
Multi-cancer
Invasiveness			The prognostic role of a gene signature from tumor...[N Engl J Med. 2007] - PubMed Result
Src oncogene			Oncogenic pathway signatures in human cancers as a...[Nature. 2006] - PubMed Result
β-catenin oncogene			Oncogenic pathway signatures in human cancers as a...[Nature. 2006] - PubMed Result
Metastasis
Breast cancer to the lung			Genes that mediate breast cancer metastasis to lun...[Nature. 2005] - PubMed Result
Primary solid tumors			A molecular signature of metastasis in primary sol...[Nat Genet. 2003] - PubMed Result
Predictive treatment response
Cisplatin			Pharmacogenomic strategies provide a rational appr...[J Clin Oncol. 2007] - PubMed Result
Pemetrexed			Pharmacogenomic strategies provide a rational appr...[J Clin Oncol. 2007] - PubMed Result
Docetaxel			Patterns of resistance and incomplete response to ...[J Clin Oncol. 2005] - PubMed Result
Paclitaxel and other compunds			Gene expression profiles predict complete patholog...[J Clin Oncol. 2004] - PubMed Result
Dasatinib (prostate cancer or			Identification of candidate predictive and surroga...[Genome Biol. 2007] - PubMed Result
prostate plus breast cancer)
EGFR tyrosine kinase inhibitors (TKIs)			Gene expression patterns that predict sensitivity ...[BMC Genomics. 2006] - PubMed Result
*Also ovarian cancer prognosis
